# Supplementary material
Source: publisher site journal article supplement (https://www.dovepress.com/article/427933)
Supplement: Supplementary file 1 [file get_supplementary_file.php]

**Supplementary Tables**

Supplementary Table 1. One-sided noncompliance with a complete violation of positivity. Simulation results for comparing the bias and variances of inverse-probability-of-treatment weighted (IPTW) estimators based on two different versions of the propensity scores. Treatment effects are heterogeneous.

| IV prevalence | IV strength | Absolute bias | | Variance x 103 | | Relative |
| --- | --- | --- | --- | --- | --- | --- |
| Pr(Z=1) | Pr(U=c) | PST-X | PST-ZX | PST-X | PST-ZX | Efficiency |
| 0.10 | 0.10 | 0.45 | 1.21 | 437.49 | 219.12 | 0.50 |
| 0.30 | 0.19 | 1.06 | 128.78 | 72.42 | 0.56 |
| 0.50 | 0.11 | 1.03 | 73.07 | 52.75 | 0.72 |
| 0.70 | 0.08 | 1.00 | 58.03 | 43.83 | 0.76 |
| 0.30 | 0.10 | 0.19 | 0.79 | 108.25 | 60.94 | 0.56 |
| 0.30 | 0.08 | 0.71 | 32.74 | 24.01 | 0.73 |
| 0.50 | 0.05 | 0.70 | 19.67 | 16.10 | 0.82 |
| 0.70 | 0.04 | 0.70 | 13.08 | 14.57 | 1.11 |
| 0.50 | 0.10 | 0.12 | 0.53 | 42.08 | 33.60 | 0.80 |
| 0.30 | 0.06 | 0.49 | 16.42 | 13.76 | 0.84 |
| 0.50 | 0.03 | 0.48 | 10.42 | 10.57 | 1.01 |
| 0.70 | 0.01 | 0.47 | 7.98 | 9.22 | 1.15 |

Abbreviations: PST-X, propensity score of treatment conditioning on pretreatment variables only; PST-ZX, propensity score of treatment conditioning on instrumental and pretreatment variables.

Supplementary Table 2. Two-sided noncompliance with a near violation of positivity. Simulation results for comparing the bias and variances of inverse-probability-of-treatment weighted (IPTW) estimators based on two different versions of the propensity scores. Treatment effects are heterogeneous.

| IV prevalence | IV strength | Absolute bias | | Variance x 103 | | Relative |
| --- | --- | --- | --- | --- | --- | --- |
| Pr(Z=1) | Pr(U=c) | PST-X | PST-ZX | PST-X | PST-ZX | Efficiency |
| 0.10 | 0.10 | 0.05 | 0.03 | 6.87 | 7.94 | 1.16 |
| 0.30 | 0.03 | 0.05 | 9.60 | 15.05 | 1.57 |
| 0.50 | 0.02 | 0.06 | 10.92 | 20.12 | 1.84 |
| 0.70 | 0.01 | 0.07 | 13.90 | 28.09 | 2.02 |
| 0.30 | 0.10 | 0.04 | 0.05 | 5.94 | 7.58 | 1.28 |
| 0.30 | 0.01 | 0.06 | 6.45 | 12.51 | 1.94 |
| 0.50 | 0.01 | 0.08 | 7.33 | 21.39 | 2.92 |
| 0.70 | 0.01 | 0.08 | 8.90 | 32.38 | 3.64 |
| 0.50 | 0.10 | 0.02 | 0.05 | 5.62 | 6.96 | 1.24 |
| 0.30 | 0.02 | 0.07 | 6.63 | 12.29 | 1.85 |
| 0.50 | 0.01 | 0.08 | 7.15 | 18.08 | 2.53 |
| 0.70 | 0.01 | 0.08 | 6.42 | 25.17 | 3.92 |

Abbreviations: PST-X, propensity score of treatment conditioning on pretreatment variables only; PST-ZX, propensity score of treatment conditioning on instrumental and pretreatment variables.

Supplementary Table 3. Two-sided noncompliance without a positivity violation. Simulation results for comparing the variances of inverse-probability-of-treatment weighted (IPTW) estimators based on two different versions of the propensity scores. Treatment effects are heterogeneous.

| IV prevalence | IV strength | Absolute bias | | Variance x 103 | | Relative |
| --- | --- | --- | --- | --- | --- | --- |
| Pr(Z=1) | Pr(U=c) | PST-X | PST-ZX | PST-X | PST-ZX | Efficiency |
| 0.10 | 0.10 | 0.01 | 0.01 | 5.84 | 5.88 | 1.01 |
| 0.30 | 0.02 | 0.02 | 6.00 | 6.30 | 1.05 |
| 0.50 | 0.04 | 0.03 | 6.53 | 7.78 | 1.19 |
| 0.70 | 0.05 | 0.06 | 8.39 | 12.44 | 1.48 |
| 0.30 | 0.10 | 0.02 | 0.01 | 5.83 | 5.86 | 1.00 |
| 0.30 | 0.03 | 0.03 | 5.13 | 5.37 | 1.05 |
| 0.50 | 0.04 | 0.06 | 5.99 | 7.35 | 1.23 |
| 0.70 | 0.03 | 0.09 | 7.23 | 12.03 | 1.66 |
| 0.50 | 0.10 | 0.01 | 0.01 | 6.03 | 6.14 | 1.02 |
| 0.30 | 0.02 | 0.03 | 6.07 | 6.28 | 1.03 |
| 0.50 | 0.02 | 0.05 | 6.25 | 7.99 | 1.28 |
| 0.70 | 0.03 | 0.10 | 6.74 | 11.77 | 1.75 |

Abbreviations: PST-X, propensity score of treatment conditioning on pretreatment variables only; PST-ZX, propensity score of treatment conditioning on instrumental and pretreatment variables.
